# Supplementary material for: Absorption and thermodynamic properties of CO2 by amido-containing anion-functionalized ionic liquids
Source: Royal Society of Chemistry journal article supplement (doi:10.1039/c8ra07832g), 2019-01-01
Supplement: c8ra07832g1.pdf [file c8ra07832g1.pdf]

*Electronic Supplementary Information*

**Absorption and thermodynamic properties of CO<sub>2</sub> in  
amido-containing anion-functionalized ionic liquids**

Yanjie Huang, Guokai Cui, Huiyong Wang, Zhiyong Li, and Jianji Wang\*

Henan Key Laboratory of Green Chemistry, Collaborative Innovation Center of  
Henan Province for Green Manufacturing of Fine Chemicals, Key Laboratory of  
Green Chemical Media and Reactions, Ministry of Education, School of Chemistry  
and Chemical Engineering, Henan Normal University, Xinxiang, Henan 453007,  
China.

E-mail: [jwang@htu.cn](mailto:jwang@htu.cn)

## $^1\text{H}$ NMR, $^{13}\text{C}$ NMR and FT-IR data of the amido-based ILs

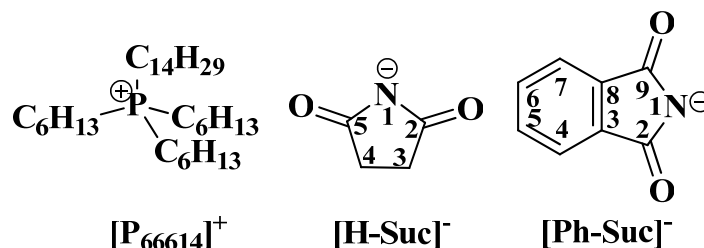

Numbering scheme for the positions in the amido-based anion-functionalized ILs

$[\text{P}_{66614}][\text{H-Suc}]$ :  $^1\text{H}$  NMR (DMSO- $d_6$ ): 0.86 (m, 12H,  $4\times\text{CH}_3$ ), 1.236-1.469 (m, 48H,  $24\times\text{CH}_2$ ), 2.05(s, 4H, C3 and C4), 2.19 (m, 8H,  $4\times\text{PCH}_2$ ) ppm;  $^{13}\text{C}$  NMR (DMSO- $d_6$ ): 13.8, 13.8, 17.3, 17.6, 20.5, 20.6, 21.2, 21.8, 21.9, 22.1, 28.1, 28.7, 28.7, 29.0, 29.0, 29.1, 29.7, 29.8, 30.0, 30.4, 30.8, 31.3, 32.5 (C3 and C4), 34.5, 35.5, 177.0, 174.4, 194.2 (C2 and C5) ppm; IR: 2955, 2923, 2854, 1764, 1696, 1672, 1572, 1465, 1416, 1377, 1315, 1273, 1240, 1211, 1163, 1112, 1003, 987, 891, 857, 821, 720  $\text{cm}^{-1}$ .

$[\text{P}_{66614}][\text{Ph-Suc}]$ :  $^1\text{H}$  NMR(DMSO- $d_6$ ): 0.86 (m, 12H,  $4\times\text{CH}_3$ ), 1.237-1.464 (m, 48H,  $24\times\text{CH}_2$ ), 2.18 (m, 8H,  $4\times\text{PCH}_2$ ), 7.30 - 7.36 (m, 4H, C4, C5, C6, and C7) ppm;  $^{13}\text{C}$  NMR (DMSO- $d_6$ ): 13.7, 13.8, 17.3, 17.6, 20.5, 20.6, 21.2, 21.8, 21.9, 22.1, 28.1, 28.7, 28.7, 29.0, 29.0, 29.1, 29.7, 29.8, 30.0, 30.4, 30.8, 31.3, 119.0 (C4 and C7), 125.8, 128.6, 129.3 (C5 and C6), 129.5, 129.9, 130.9, 139.6 (C3 and C8), 145.0, 169.4, 172.9, 185.0 (C2 and C9) ppm; IR: 2955, 2924, 2854, 1698, 1662, 1619, 1588, 1571, 1465, 1460, 1409, 1378, 1364, 1343, 1273, 1202, 1178, 1158, 1125, 1004, 861, 831, 814, 721  $\text{cm}^{-1}$ .

Table S1. Solubility ( $n_{\text{CO}_2}$ ) of  $\text{CO}_2$  in  $[\text{P}_{66614}][\text{H-Suc}]$  at different temperatures ( $T$ ) and  $\text{CO}_2$  partial pressures ( $P_{\text{CO}_2}$ ).

| $P_{\text{CO}_2}$<br>(100 kPa) | $n_{\text{CO}_2}$<br>(mol $\text{CO}_2$ mol $^{-1}$ IL) | $P_{\text{CO}_2}$<br>(100 kPa) | $n_{\text{CO}_2}$<br>(mol $\text{CO}_2$ mol $^{-1}$ IL) |
|--------------------------------|---------------------------------------------------------|--------------------------------|---------------------------------------------------------|
| $T = 308.15$ K                 |                                                         | $T = 313.15$ K                 |                                                         |
| 0.025                          | 0.36                                                    | 0.025                          | 0.16                                                    |
| 0.05                           | 0.50                                                    | 0.05                           | 0.26                                                    |
| 0.075                          | 0.57                                                    | 0.075                          | 0.35                                                    |
| 0.10                           | 0.61                                                    | 0.10                           | 0.43                                                    |
| 0.15                           | 0.70                                                    | 0.15                           | 0.52                                                    |
| 0.20                           | 0.76                                                    | 0.20                           | 0.57                                                    |
| 0.25                           | 0.82                                                    | 0.25                           | 0.64                                                    |
| 0.30                           | 0.86                                                    | 0.30                           | 0.68                                                    |
| 0.50                           | 0.92                                                    | 0.50                           | 0.73                                                    |
| 0.70                           | 0.94                                                    | 0.70                           | 0.74                                                    |
| 1.00                           | 0.95                                                    | 1.00                           | 0.76                                                    |
| $T = 318.15$ K                 |                                                         | $T = 323.15$ K                 |                                                         |
| 0.025                          | 0.10                                                    | 0.025                          | 0.04                                                    |
| 0.05                           | 0.16                                                    | 0.05                           | 0.07                                                    |
| 0.075                          | 0.21                                                    | 0.075                          | 0.11                                                    |
| 0.10                           | 0.32                                                    | 0.10                           | 0.14                                                    |
| 0.15                           | 0.40                                                    | 0.15                           | 0.19                                                    |
| 0.20                           | 0.45                                                    | 0.20                           | 0.24                                                    |
| 0.25                           | 0.50                                                    | 0.25                           | 0.29                                                    |
| 0.30                           | 0.57                                                    | 0.30                           | 0.32                                                    |
| 0.50                           | 0.60                                                    | 0.50                           | 0.41                                                    |
| 0.70                           | 0.61                                                    | 0.70                           | 0.43                                                    |
| 1.00                           | 0.66                                                    | 1.00                           | 0.45                                                    |

Table S2. Solubility ( $n_{\text{CO}_2}$ ) of  $\text{CO}_2$  in  $[\text{P}_{66614}][\text{Ph-Suc}]$  at different temperatures ( $T$ ) and  $\text{CO}_2$  partial pressures ( $P_{\text{CO}_2}$ ).

| $P_{\text{CO}_2}$<br>(100 kPa) | $n_{\text{CO}_2}$<br>(mol $\text{CO}_2$ mol $^{-1}$ IL) | $P_{\text{CO}_2}$<br>(100 kPa) | $n_{\text{CO}_2}$<br>(mol $\text{CO}_2$ mol $^{-1}$ IL) |
|--------------------------------|---------------------------------------------------------|--------------------------------|---------------------------------------------------------|
| $T = 308.15 \text{ K}$         |                                                         | $T = 313.15 \text{ K}$         |                                                         |
| 0.05                           | 0.18                                                    | 0.05                           | 0.10                                                    |
| 0.10                           | 0.30                                                    | 0.10                           | 0.19                                                    |
| 0.15                           | 0.37                                                    | 0.15                           | 0.26                                                    |
| 0.25                           | 0.46                                                    | 0.25                           | 0.34                                                    |
| 0.30                           | 0.52                                                    | 0.30                           | 0.38                                                    |
| 0.50                           | 0.61                                                    | 0.50                           | 0.45                                                    |
| 0.70                           | 0.66                                                    | 0.70                           | 0.49                                                    |
| 1.00                           | 0.73                                                    | 1.00                           | 0.52                                                    |
| $T = 318.15 \text{ K}$         |                                                         | $T = 323.15 \text{ K}$         |                                                         |
| 0.05                           | 0.06                                                    | 0.05                           | 0.04                                                    |
| 0.10                           | 0.13                                                    | 0.10                           | 0.09                                                    |
| 0.15                           | 0.19                                                    | 0.15                           | 0.13                                                    |
| 0.25                           | 0.25                                                    | 0.25                           | 0.19                                                    |
| 0.30                           | 0.28                                                    | 0.30                           | 0.22                                                    |
| 0.50                           | 0.35                                                    | 0.50                           | 0.27                                                    |
| 0.70                           | 0.41                                                    | 0.70                           | 0.31                                                    |
| 1.00                           | 0.47                                                    | 1.00                           | 0.38                                                    |

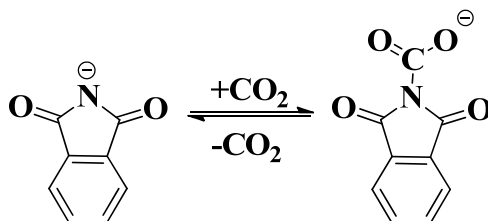

Scheme S1. Possible mechanism of  $\text{CO}_2$  absorption by  $[\text{P}_{66614}][\text{Ph-Suc}]$ .

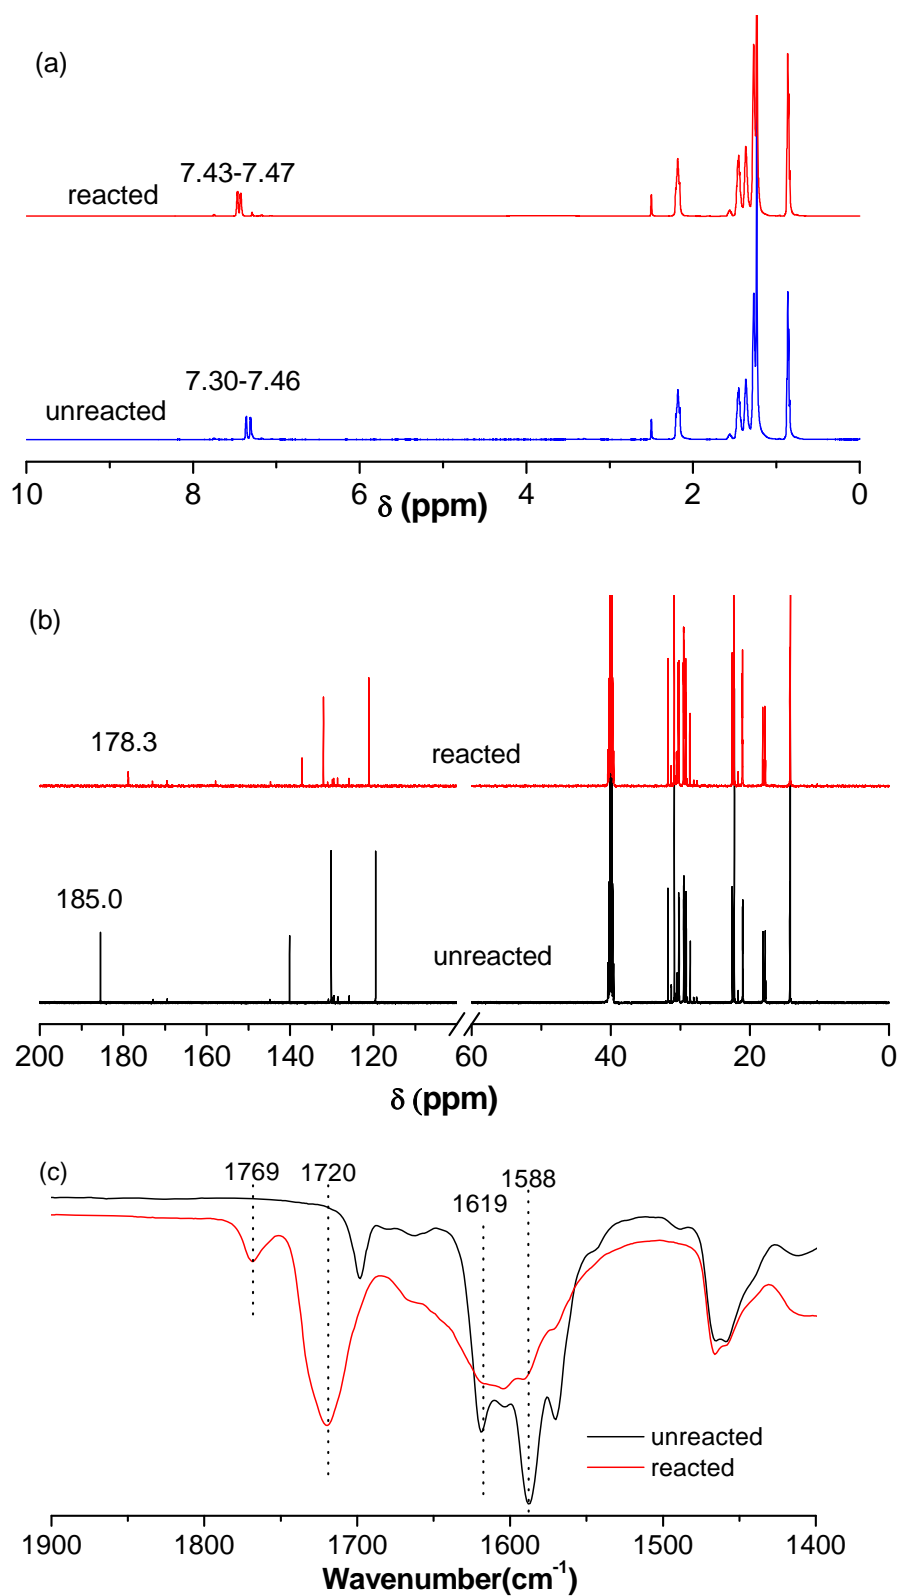

Figure S1.  $^1H$  NMR (a),  $^{13}C$  NMR (b) and FT-IR (c) spectra of  $[P_{66614}][Ph-Suc]$  before and after absorption of  $CO_2$ .
